# Supplementary material for: Abnormal enterohepatic circulation of bile acids caused by fructooligosaccharide supplementation along with a high-fat diet
Source: Royal Society of Chemistry journal article supplement (doi:10.1039/d4fo03353a), 2024-01-01
Supplement: d4fo03353a1.pdf [file d4fo03353a1.pdf]

**Supplementary Table 1.** Primers for RT-qPCR

| Gene           | Primer Sequences                   |
|----------------|------------------------------------|
| $\beta$ -actin | (F):5'-AGCCATGTACGTAGCCATCCA-3'    |
|                | (R):5'-TCTCCGGAGTCCATCACAATG-3'    |
| fxr            | (F):5'-TGGGCTCCGAATCCTCTTAGA-3'    |
|                | (R):5'-TGGTCCTCAAATAAGATCCTTGG-3'  |
| cyp7a1         | (F):5'-AACAACTGCCAGTACTAGATAGC-3'  |
|                | (R):5'-GTGTAGAGTGAAGTCCTCCTTAGC-3' |
| fgf15          | (F):5'-GCCATCAAGGACGTCAGCA-3'      |
|                | (R):5'-CTTCCTCCGAGTAGCGAATCAG-3'   |
| bsep           | (F):5'-CTGCCAAGGATGCTAATGCA-3'     |
|                | (R):5'-CGATGGCTACCCTTTGCTTCT-3'    |
| fgfr4          | (F):5'-GCATCTTTCAGGGGACACCA-3'     |
|                | (R):5'-TTGTACCAGTGACGACCACG-3'     |
| shp            | (F):5'-TCTGCAGGTCGTCCGACTATTC-3'   |
|                | (R):5'-AGGCAGTGGCTGTGAGATGC-3'     |
| tnf- $\alpha$  | (F):5'-TTCTATTCTGCTTGTGG-3'        |
|                | (R):5'-ACTTGGTGGTTTGCTACG-3'       |
| il-1 $\beta$   | (F):5'-CCAGCTTCAAATCTCACAGCAG-3'   |
|                | (R):5'-CTTCTTTGGGTATTGCTTGGGATC-3' |
| il-6           | (F):5'-CCACCAAGAACGATAGTCAA-3'     |
|                | (R):5'-TTTCCACGATTTCCCAGA-3'       |

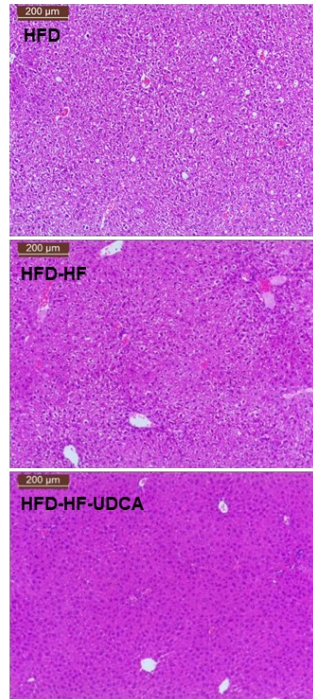

**Supplementary Figure 1.** Hematoxylin-eosin (HE) staining of liver tissue sections

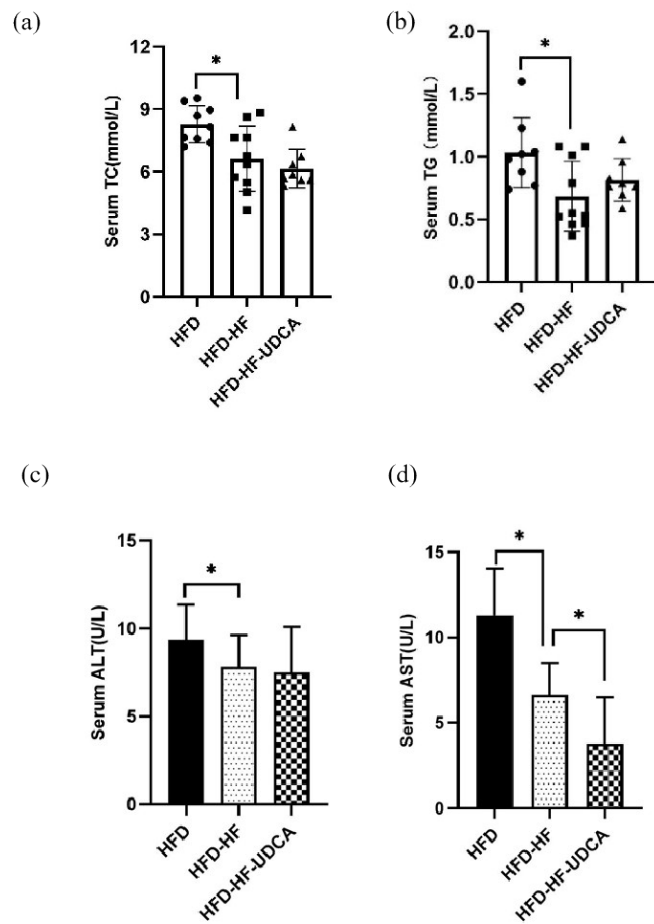

**Supplementary Figure 2.** The TC (a), TG (b), ALT (c), and AST (d) levels in the serum of mice in the HFD, HFD-HF and HFD-HF-UDCA groups

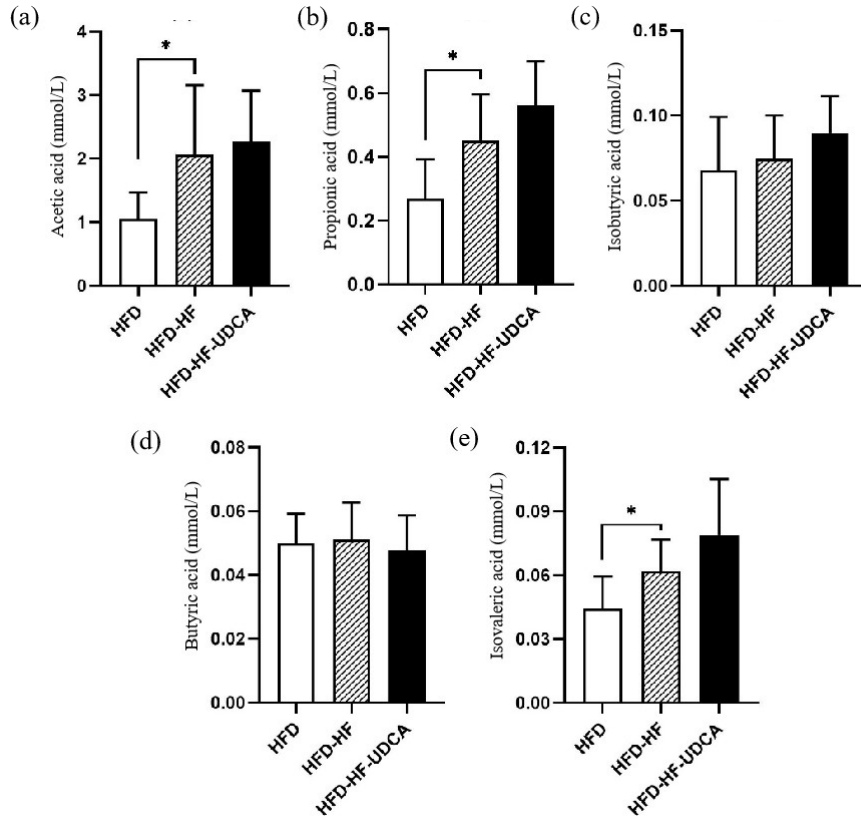

**Supplementary Figure 3.** The determination of fecal short chain fatty acids by gas chromatography. (a)Acetic acid; (b)Propionic acid; (c)Isobutyric; (d)Butyric acid; (e)Isovaleric acid

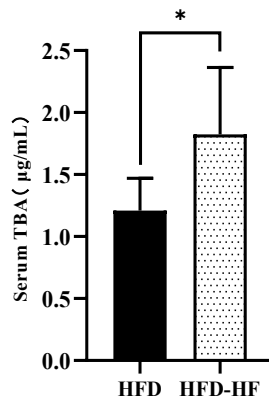

**Supplementary Figure 4.** Serum TBA levels

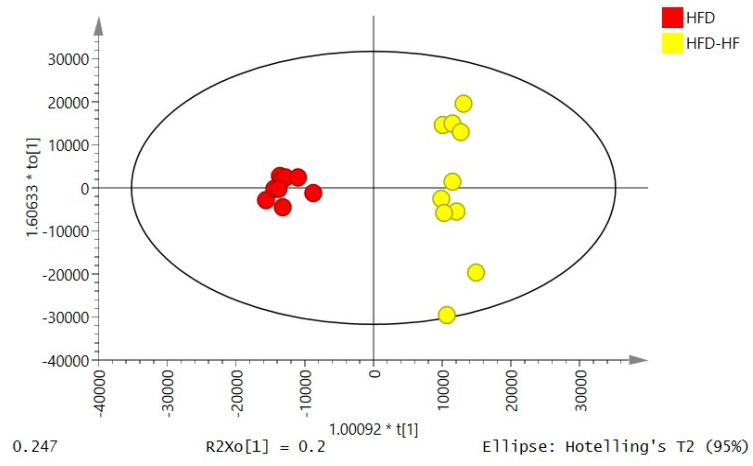

**Supplementary Figure 5.** The OPLS-DA score plot of mice faeces metabolomics data.
